# Supplementary material for: Touch-screen-guided task reveals a prosocial choice tendency by chimpanzees (Pan troglodytes)
Source: PeerJ. 2018 Jul 31;6:e5315. doi: 10.7717/peerj.5315 (PMC6074756; doi:10.7717/peerj.5315)
Supplement: Data S1 [file peerj-06-5315-s001.xlsx]

## Sheet: RawData
Experiment 1						Experiment 2									Experiment 3
Individual	Trial	Altruistic	Prosocial	Selfish				Prosocial - Altruistic		Prosocial - Selfish		Selfish - Altruistic					Prosocial - Altruistic		Prosocial - Selfish		Selfish - Altruistic
Ai	1	1	0	0		Individual	Trial	Prosocial	Altruistic	Prosocial	Selfish	Selfish	Altruistic		Individual	Trial	Prosocial	Altruistic	Prosocial	Selfish	Selfish	Altruistic
Ai	2	1	0	0		Ai	1	1	0	1	0	1	0		Ai	1	1	0	1	0	1	0
Ai	3	1	0	0		Ai	2	1	0	0	1	1	0		Ai	2	1	0	1	0	1	0
Ai	4	0	0	1		Ai	3	1	0	0	1	1	0		Ai	3	1	0	0	1	0	1
Ai	5	0	0	1		Ai	4	1	0	1	0	1	0		Ai	4	1	0	1	0	1	0
Ai	6	0	1	0		Ai	5	1	0	1	0	1	0		Ai	5	1	0	1	0	1	0
Ai	7	0	1	0		Ai	6	1	0	1	0	1	0		Ai	6	1	0	1	0	1	0
Ai	8	0	0	1		Ai	7	1	0	1	0	1	0		Ai	7	1	0	1	0	1	0
Ai	9	0	0	1		Ai	8	1	0	1	0	1	0		Ai	8	1	0	1	0	1	0
Ai	10	0	0	1		Ai	9	1	0	1	0	1	0		Ai	9	1	0	1	0	1	0
Ai	11	0	0	1		Ai	10	1	0	1	0	1	0		Ai	10	1	0	1	0	1	0
Ai	12	0	1	0		Ai	11	1	0	1	0	1	0		Ai	11	1	0	1	0	1	0
Ai	13	0	1	0		Ai	12	1	0	1	0	0	1		Ai	12	1	0	1	0	1	0
Ai	14	0	0	1		Ai	13	1	0	1	0	1	0		Ai	13	1	0	1	0	1	0
Ai	15	0	1	0		Ai	14	1	0	1	0	1	0		Ai	14	1	0	1	0	1	0
Ai	16	0	0	1		Ai	15	1	0	1	0	1	0		Ai	15	1	0	1	0	1	0
Ai	17	0	1	0		Ai	16	1	0	1	0	1	0		Ai	16	1	0	1	0	1	0
Ai	18	0	0	1		Ai	17	1	0	1	0	1	0		Ai	17	1	0	1	0	1	0
Ai	19	0	1	0		Ai	18	1	0	0	1	1	0		Ai	18	1	0	1	0	1	0
Ai	20	0	0	1		Ai	19	1	0	1	0	1	0		Ai	19	1	0	1	0	1	0
Ai	21	0	0	1		Ai	20	1	0	1	0	1	0		Ai	20	1	0	1	0	1	0
Ai	22	0	1	0		Ai	21	1	0	1	0	1	0		Ai	21	1	0	1	0	1	0
Ai	23	1	0	0		Ai	22	1	0	1	0	1	0		Ai	22	1	0	1	0	1	0
Ai	24	0	0	1		Ai	23	1	0	1	0	1	0		Ai	23	1	0	1	0	1	0
Ai	25	0	1	0		Ai	24	1	0	1	0	1	0		Ai	24	1	0	1	0	1	0
Ai	26	0	0	1		Ai	25	1	0	1	0	1	0		Ai	25	1	0	1	0	1	0
Ai	27	0	1	0		Ai	26	1	0	1	0	1	0		Ai	26	1	0	1	0	1	0
Ai	28	0	1	0		Ai	27	1	0	1	0	1	0		Ai	27	1	0	1	0	1	0
Ai	29	0	0	1		Ai	28	1	0	1	0	1	0		Ai	28	1	0	1	0	1	0
Ai	30	0	1	0		Ai	29	1	0	1	0	0	1		Ai	29	1	0	1	0	1	0
Ai	31	0	0	1		Ai	30	1	0	1	0	1	0		Ai	30	1	0	1	0	1	0
Ai	32	0	1	0		Ai	31	1	0	1	0	1	0		Ai	31	1	0	1	0	1	0
Ai	33	0	0	1		Ai	32	1	0	1	0	1	0		Ai	32	1	0	1	0	1	0
Ai	34	0	1	0		Am	1	1	0	1	0	1	0		Ai	33	1	0	1	0	1	0
Ai	35	0	1	0		Am	2	1	0	1	0	0	1		Ai	34	1	0	1	0	1	0
Ai	36	0	0	1		Am	3	1	0	1	0	0	1		Ai	35	1	0	1	0	1	0
Ai	37	0	1	0		Am	4	1	0	1	0	1	0		Ai	36	1	0	1	0	1	0
Ai	38	0	1	0		Am	5	1	0	0	1	1	0		Ai	37	1	0	1	0	1	0
Ai	39	0	0	1		Am	6	1	0	1	0	1	0		Ai	38	1	0	1	0	1	0
Ai	40	0	1	0		Am	7	1	0	0	1	1	0		Ai	39	1	0	1	0	1	0
Ai	41	0	1	0		Am	8	1	0	1	0	0	1		Ai	40	1	0	1	0	1	0
Ai	42	0	1	0		Am	9	1	0	1	0	1	0		Ai	41	1	0	1	0	1	0
Ai	43	0	1	0		Am	10	1	0	0	1	1	0		Ai	42	1	0	1	0	1	0
Ai	44	0	1	0		Am	11	1	0	1	0	0	1		Ai	43	1	0	1	0	1	0
Ai	45	0	1	0		Am	12	1	0	1	0	1	0		Ai	44	1	0	1	0	1	0
Ai	46	0	0	1		Am	13	1	0	1	0	1	0		Ai	45	1	0	1	0	1	0
Ai	47	0	1	0		Am	14	1	0	0	1	1	0		Ai	46	1	0	1	0	1	0
Ai	48	0	1	0		Am	15	1	0	1	0	1	0		Ai	47	1	0	1	0	1	0
Ai	49	0	1	0		Am	16	1	0	1	0	1	0		Ai	48	1	0	1	0	1	0
Ai	50	0	1	0		Am	17	1	0	1	0	1	0		Ai	49	1	0	1	0	1	0
Ai	51	0	1	0		Am	18	1	0	0	1	1	0		Ai	50	1	0	1	0	1	0
Ai	52	0	1	0		Am	19	1	0	1	0	0	1		Ai	51	1	0	1	0	1	0
Ai	53	0	1	0		Am	20	1	0	0	1	1	0		Ai	52	1	0	1	0	1	0
Ai	54	0	1	0		Am	21	1	0	0	1	0	1		Ai	53	1	0	1	0	1	0
Ai	55	0	1	0		Am	22	1	0	1	0	1	0		Ai	54	1	0	1	0	1	0
Ai	56	0	1	0		Am	23	1	0	0	1	0	1		Ai	55	1	0	1	0	1	0
Ai	57	0	1	0		Am	24	1	0	1	0	1	0		Ai	56	1	0	1	0	1	0
Ai	58	0	1	0		Am	25	1	0	1	0	1	0		Ai	57	1	0	1	0	1	0
Ai	59	0	1	0		Am	26	1	0	0	1	1	0		Ai	58	1	0	1	0	1	0
Ai	60	0	1	0		Am	27	1	0	1	0	1	0		Ai	59	1	0	1	0	1	0
Ai	61	0	1	0		Am	28	1	0	1	0	0	1		Ai	60	1	0	1	0	1	0
Ai	62	0	1	0		Am	29	1	0	0	1	1	0		Ai	61	1	0	1	0	1	0
Ai	63	0	1	0		Am	30	1	0	1	0	1	0		Ai	62	1	0	1	0	1	0
Ai	64	0	1	0		Am	31	1	0	0	1	1	0		Ai	63	1	0	1	0	1	0
Ai	65	0	1	0		Am	32	1	0	0	1	1	0		Ai	64	1	0	1	0	1	0
Ai	66	0	1	0		Ch	1	0	1	0	1	0	1		Ai	65	1	0	1	0	1	0
Ai	67	0	1	0		Ch	2	0	1	0	1	1	0		Ai	66	1	0	1	0	1	0
Ai	68	0	1	0		Ch	3	1	0	0	1	0	1		Ai	67	1	0	1	0	1	0
Ai	69	0	1	0		Ch	4	1	0	0	1	1	0		Ai	68	1	0	1	0	1	0
Ai	70	0	1	0		Ch	5	1	0	1	0	1	0		Ai	69	1	0	1	0	1	0
Ai	71	0	1	0		Ch	6	0	1	0	1	1	0		Ai	70	1	0	1	0	1	0
Ai	72	0	1	0		Ch	7	0	1	0	1	0	1		Ai	71	1	0	1	0	1	0
Ai	73	0	1	0		Ch	8	1	0	0	1	1	0		Ai	72	1	0	1	0	1	0
Ai	74	0	1	0		Ch	9	1	0	0	1	1	0		Ai	73	1	0	1	0	1	0
Ai	75	0	1	0		Ch	10	1	0	1	0	1	0		Ai	74	1	0	1	0	1	0
Ai	76	0	1	0		Ch	11	1	0	1	0	0	1		Ai	75	1	0	1	0	1	0
Ai	77	0	1	0		Ch	12	1	0	1	0	1	0		Ai	76	1	0	1	0	1	0
Ai	78	0	1	0		Ch	13	1	0	1	0	1	0		Ai	77	1	0	1	0	1	0
Ai	79	0	1	0		Ch	14	1	0	1	0	1	0		Ai	78	1	0	1	0	1	0
Ai	80	0	1	0		Ch	15	1	0	1	0	1	0		Ai	79	1	0	1	0	1	0
Ai	81	0	1	0		Ch	16	1	0	1	0	1	0		Ai	80	1	0	1	0	1	0
Ai	82	0	1	0		Ch	17	0	1	1	0	1	0		Ai	81	1	0	1	0	1	0
Ai	83	0	1	0		Ch	18	1	0	1	0	1	0		Ai	82	1	0	1	0	1	0
Ai	84	0	1	0		Ch	19	1	0	1	0	1	0		Ai	83	1	0	1	0	1	0
Ai	85	0	1	0		Ch	20	1	0	1	0	1	0		Ai	84	1	0	1	0	1	0
Ai	86	0	1	0		Ch	21	1	0	1	0	1	0		Ai	85	1	0	1	0	1	0
Ai	87	0	1	0		Ch	22	1	0	1	0	1	0		Ai	86	1	0	1	0	1	0
Ai	88	0	1	0		Ch	23	1	0	1	0	1	0		Ai	87	1	0	1	0	1	0
Ai	89	0	1	0		Ch	24	1	0	1	0	1	0		Ai	88	1	0	1	0	1	0
Ai	90	0	1	0		Ch	25	1	0	1	0	1	0		Ai	89	1	0	1	0	1	0
Ai	91	0	1	0		Ch	26	1	0	1	0	1	0		Ai	90	1	0	1	0	1	0
Ai	92	0	1	0		Ch	27	1	0	1	0	1	0		Ai	91	1	0	1	0	1	0
Ai	93	0	1	0		Ch	28	1	0	1	0	1	0		Ai	92	1	0	1	0	1	0
Ai	94	0	1	0		Ch	29	1	0	1	0	1	0		Ai	93	1	0	1	0	1	0
Ai	95	0	1	0		Ch	30	1	0	1	0	1	0		Ai	94	1	0	1	0	1	0
Ai	96	0	1	0		Ch	31	1	0	1	0	1	0		Ai	95	1	0	1	0	1	0
Ai	97	0	1	0		Ch	32	1	0	1	0	1	0		Ai	96	1	0	1	0	1	0
Ai	98	0	1	0		Cl	1	1	0	1	0	1	0		Am	1	1	0	1	0	0	1
Ai	99	0	0	1		Cl	2	1	0	1	0	1	0		Am	2	1	0	1	0	1	0
Ai	100	0	1	0		Cl	3	1	0	1	0	1	0		Am	3	1	0	1	0	1	0
Ai	101	0	1	0		Cl	4	1	0	1	0	0	1		Am	4	1	0	1	0	1	0
Ai	102	0	0	1		Cl	5	1	0	1	0	1	0		Am	5	1	0	1	0	1	0
Ai	103	1	0	0		Cl	6	1	0	1	0	1	0		Am	6	1	0	0	1	1	0
Ai	104	0	1	0		Cl	7	1	0	1	0	1	0		Am	7	1	0	1	0	1	0
Ai	105	0	1	0		Cl	8	1	0	1	0	1	0		Am	8	1	0	1	0	1	0
Ai	106	0	1	0		Cl	9	1	0	1	0	1	0		Am	9	1	0	1	0	0	1
Ai	107	0	1	0		Cl	10	1	0	1	0	1	0		Am	10	1	0	1	0	1	0
Ai	108	0	1	0		Cl	11	1	0	1	0	1	0		Am	11	1	0	1	0	1	0
Ai	109	0	1	0		Cl	12	1	0	1	0	1	0		Am	12	1	0	1	0	1	0
Ai	110	0	1	0		Cl	13	1	0	1	0	1	0		Am	13	1	0	1	0	1	0
Ai	111	0	1	0		Cl	14	1	0	1	0	1	0		Am	14	1	0	1	0	1	0
Ai	112	0	1	0		Cl	15	1	0	1	0	0	1		Am	15	1	0	1	0	1	0
Ai	113	0	1	0		Cl	16	1	0	1	0	1	0		Am	16	1	0	0	1	1	0
Ai	114	0	1	0		Cl	17	1	0	1	0	0	1		Am	17	1	0	1	0	1	0
Ai	115	0	1	0		Cl	18	1	0	1	0	1	0		Am	18	1	0	1	0	1	0
Ai	116	0	1	0		Cl	19	1	0	1	0	1	0		Am	19	1	0	1	0	1	0
Ai	117	0	1	0		Cl	20	1	0	1	0	0	1		Am	20	1	0	1	0	1	0
Ai	118	0	1	0		Cl	21	1	0	1	0	1	0		Am	21	1	0	1	0	1	0
Ai	119	0	1	0		Cl	22	1	0	1	0	0	1		Am	22	1	0	1	0	1	0
Ai	120	0	1	0		Cl	23	1	0	1	0	1	0		Am	23	1	0	1	0	1	0
Ai	121	0	1	0		Cl	24	1	0	1	0	0	1		Am	24	1	0	1	0	1	0
Ai	122	0	1	0		Cl	25	1	0	1	0	0	1		Am	25	1	0	0	1	1	0
Ai	123	0	1	0		Cl	26	1	0	1	0	1	0		Am	26	1	0	1	0	1	0
Ai	124	0	1	0		Cl	27	1	0	1	0	0	1		Am	27	1	0	1	0	1	0
Ai	125	0	1	0		Cl	28	1	0	1	0	0	1		Am	28	1	0	1	0	1	0
Ai	126	0	1	0		Cl	29	1	0	1	0	0	1		Am	29	1	0	1	0	1	0
Ai	127	0	1	0		Cl	30	1	0	1	0	0	1		Am	30	1	0	1	0	1	0
Ai	128	0	1	0		Cl	31	1	0	1	0	0	1		Am	31	1	0	1	0	1	0
Ai	129	0	1	0		Cl	32	1	0	1	0	0	1		Am	32	1	0	0	1	1	0
Ai	130	0	1	0		Pn	1	1	0	0	1	1	0		Am	33	1	0	1	0	1	0
Ai	131	0	1	0		Pn	2	1	0	0	1	1	0		Am	34	1	0	1	0	1	0
Ai	132	0	1	0		Pn	3	1	0	0	1	1	0		Am	35	1	0	1	0	1	0
Ai	133	0	1	0		Pn	4	1	0	0	1	1	0		Am	36	1	0	1	0	1	0
Ai	134	0	1	0		Pn	5	1	0	0	1	1	0		Am	37	1	0	1	0	1	0
Ai	135	0	1	0		Pn	6	0	1	0	1	1	0		Am	38	1	0	1	0	1	0
Ai	136	0	1	0		Pn	7	1	0	1	0	1	0		Am	39	1	0	1	0	1	0
Ai	137	0	1	0		Pn	8	1	0	0	1	1	0		Am	40	1	0	1	0	1	0
Ai	138	0	1	0		Pn	9	1	0	0	1	1	0		Am	41	1	0	1	0	1	0
Ai	139	0	1	0		Pn	10	1	0	0	1	1	0		Am	42	1	0	1	0	1	0
Ai	140	0	1	0		Pn	11	0	1	0	1	1	0		Am	43	1	0	1	0	1	0
Ai	141	0	1	0		Pn	12	1	0	0	1	1	0		Am	44	1	0	1	0	1	0
Ai	142	0	1	0		Pn	13	1	0	0	1	1	0		Am	45	1	0	1	0	1	0
Ai	143	0	1	0		Pn	14	1	0	0	1	1	0		Am	46	1	0	1	0	1	0
Ai	144	0	1	0		Pn	15	1	0	0	1	1	0		Am	47	1	0	1	0	1	0
Am	1	1	0	0		Pn	16	1	0	0	1	1	0		Am	48	1	0	1	0	1	0
Am	2	0	0	1		Pn	17	1	0	0	1	1	0		Am	49	1	0	1	0	1	0
Am	3	1	0	0		Pn	18	0	1	0	1	1	0		Am	50	1	0	0	1	1	0
Am	4	1	0	0		Pn	19	1	0	0	1	1	0		Am	51	1	0	1	0	1	0
Am	5	0	0	1		Pn	20	1	0	0	1	1	0		Am	52	1	0	1	0	1	0
Am	6	0	0	1		Pn	21	1	0	0	1	1	0		Am	53	1	0	1	0	1	0
Am	7	0	0	1		Pn	22	1	0	0	1	1	0		Am	54	1	0	1	0	1	0
Am	8	1	0	0		Pn	23	1	0	0	1	1	0		Am	55	1	0	1	0	1	0
Am	9	0	0	1		Pn	24	1	0	0	1	1	0		Am	56	1	0	1	0	1	0
Am	10	0	0	1		Pn	25	1	0	0	1	1	0		Am	57	1	0	1	0	1	0
Am	11	0	0	1		Pn	26	1	0	0	1	1	0		Am	58	1	0	1	0	1	0
Am	12	0	1	0		Pn	27	0	1	0	1	1	0		Am	59	1	0	1	0	1	0
Am	13	0	0	1		Pn	28	1	0	0	1	1	0		Am	60	1	0	1	0	1	0
Am	14	0	1	0		Pn	29	1	0	0	1	1	0		Am	61	1	0	0	1	1	0
Am	15	0	1	0		Pn	30	1	0	0	1	1	0		Am	62	1	0	1	0	1	0
Am	16	0	0	1		Pn	31	1	0	0	1	1	0		Am	63	1	0	1	0	1	0
Am	17	0	1	0		Pn	32	1	0	0	1	1	0		Am	64	1	0	1	0	1	0
Am	18	0	0	1		Pl	1	1	0	1	0	1	0		Am	65	1	0	1	0	1	0
Am	19	0	1	0		Pl	2	1	0	1	0	1	0		Am	66	1	0	1	0	1	0
Am	20	0	0	1		Pl	3	1	0	1	0	1	0		Am	67	1	0	1	0	1	0
Am	21	0	1	0		Pl	4	1	0	1	0	1	0		Am	68	1	0	1	0	1	0
Am	22	1	0	0		Pl	5	1	0	1	0	1	0		Am	69	1	0	1	0	1	0
Am	23	0	0	1		Pl	6	1	0	1	0	1	0		Am	70	1	0	1	0	1	0
Am	24	0	1	0		Pl	7	1	0	1	0	0	1		Am	71	1	0	1	0	1	0
Am	25	0	0	1		Pl	8	1	0	1	0	1	0		Am	72	1	0	1	0	1	0
Am	26	0	1	0		Pl	9	1	0	1	0	1	0		Am	73	1	0	1	0	1	0
Am	27	0	0	1		Pl	10	1	0	1	0	0	1		Am	74	1	0	0	1	1	0
Am	28	0	1	0		Pl	11	1	0	1	0	1	0		Am	75	1	0	1	0	1	0
Am	29	0	0	1		Pl	12	1	0	1	0	1	0		Am	76	1	0	1	0	1	0
Am	30	0	1	0		Pl	13	1	0	1	0	1	0		Am	77	1	0	1	0	1	0
Am	31	0	1	0		Pl	14	1	0	1	0	1	0		Am	78	1	0	1	0	1	0
Am	32	0	1	0		Pl	15	1	0	1	0	1	0		Am	79	1	0	1	0	1	0
Am	33	0	0	1		Pl	16	1	0	1	0	1	0		Am	80	1	0	1	0	1	0
Am	34	0	1	0		Pl	17	1	0	1	0	1	0		Am	81	1	0	1	0	1	0
Am	35	0	1	0		Pl	18	1	0	1	0	0	1		Am	82	1	0	1	0	1	0
Am	36	0	1	0		Pl	19	1	0	1	0	1	0		Am	83	1	0	1	0	1	0
Am	37	0	0	1		Pl	20	1	0	1	0	1	0		Am	84	1	0	1	0	1	0
Am	38	0	1	0		Pl	21	1	0	1	0	1	0		Am	85	1	0	1	0	1	0
Am	39	0	1	0		Pl	22	1	0	1	0	0	1		Am	86	1	0	1	0	1	0
Am	40	0	1	0		Pl	23	1	0	1	0	1	0		Am	87	1	0	1	0	1	0
Am	41	0	1	0		Pl	24	1	0	1	0	1	0		Am	88	1	0	1	0	1	0
Am	42	0	1	0		Pl	25	1	0	1	0	1	0		Am	89	1	0	1	0	1	0
Am	43	0	1	0		Pl	26	1	0	0	1	0	1		Am	90	1	0	1	0	1	0
Am	44	0	1	0		Pl	27	1	0	1	0	0	1		Am	91	1	0	1	0	1	0
Am	45	0	1	0		Pl	28	1	0	1	0	0	1		Am	92	1	0	1	0	1	0
Am	46	0	1	0		Pl	29	1	0	1	0	1	0		Am	93	1	0	1	0	1	0
Am	47	0	1	0		Pl	30	1	0	1	0	1	0		Am	94	1	0	1	0	1	0
Am	48	0	1	0		Pl	31	1	0	1	0	1	0		Am	95	1	0	1	0	1	0
Am	49	0	0	1		Pl	32	1	0	1	0	0	1		Am	96	1	0	1	0	1	0
Am	50	0	1	0											Ch	1	1	0	0	1	0	1
Am	51	0	1	0											Ch	2	1	0	1	0	1	0
Am	52	0	1	0											Ch	3	1	0	0	1	0	1
Am	53	0	1	0											Ch	4	1	0	1	0	1	0
Am	54	0	1	0											Ch	5	1	0	0	1	1	0
Am	55	0	1	0											Ch	6	1	0	1	0	1	0
Am	56	0	1	0											Ch	7	1	0	1	0	1	0
Am	57	0	1	0											Ch	8	1	0	0	1	1	0
Am	58	0	1	0											Ch	9	1	0	1	0	1	0
Am	59	0	1	0											Ch	10	1	0	1	0	1	0
Am	60	0	1	0											Ch	11	1	0	1	0	1	0
Am	61	0	1	0											Ch	12	1	0	1	0	1	0
Am	62	0	1	0											Ch	13	1	0	1	0	1	0
Am	63	0	1	0											Ch	14	1	0	1	0	1	0
Am	64	0	1	0											Ch	15	1	0	1	0	1	0
Am	65	0	1	0											Ch	16	1	0	1	0	1	0
Am	66	0	1	0											Ch	17	1	0	1	0	1	0
Am	67	0	1	0											Ch	18	1	0	1	0	1	0
Am	68	0	1	0											Ch	19	1	0	1	0	1	0
Am	69	0	1	0											Ch	20	1	0	1	0	1	0
Am	70	0	1	0											Ch	21	1	0	1	0	1	0
Am	71	0	1	0											Ch	22	1	0	1	0	1	0
Am	72	0	1	0											Ch	23	1	0	1	0	1	0
Am	73	0	1	0											Ch	24	1	0	1	0	1	0
Am	74	0	1	0											Ch	25	1	0	1	0	1	0
Am	75	0	1	0											Ch	26	1	0	1	0	1	0
Am	76	0	1	0											Ch	27	1	0	1	0	1	0
Am	77	0	1	0											Ch	28	1	0	1	0	1	0
Am	78	0	1	0											Ch	29	1	0	1	0	1	0
Am	79	0	1	0											Ch	30	1	0	1	0	1	0
Am	80	0	1	0											Ch	31	1	0	1	0	1	0
Am	81	0	1	0											Ch	32	1	0	1	0	1	0
Am	82	0	1	0											Ch	33	1	0	1	0	1	0
Am	83	0	1	0											Ch	34	1	0	1	0	1	0
Am	84	0	1	0											Ch	35	1	0	1	0	1	0
Am	85	0	1	0											Ch	36	1	0	1	0	1	0
Am	86	0	1	0											Ch	37	1	0	1	0	1	0
Am	87	0	1	0											Ch	38	1	0	1	0	1	0
Am	88	0	1	0											Ch	39	1	0	1	0	1	0
Am	89	0	1	0											Ch	40	1	0	1	0	1	0
Am	90	0	1	0											Ch	41	1	0	1	0	1	0
Am	91	0	1	0											Ch	42	1	0	1	0	1	0
Am	92	0	1	0											Ch	43	1	0	1	0	1	0
Am	93	0	1	0											Ch	44	1	0	1	0	1	0
Am	94	0	1	0											Ch	45	1	0	1	0	1	0
Am	95	0	1	0											Ch	46	1	0	1	0	1	0
Am	96	0	1	0											Ch	47	1	0	1	0	1	0
Am	97	0	1	0											Ch	48	1	0	1	0	1	0
Am	98	0	1	0											Ch	49	1	0	1	0	1	0
Am	99	0	1	0											Ch	50	1	0	1	0	1	0
Am	100	0	1	0											Ch	51	1	0	1	0	1	0
Am	101	0	1	0											Ch	52	1	0	1	0	1	0
Am	102	0	1	0											Ch	53	1	0	1	0	1	0
Am	103	0	1	0											Ch	54	1	0	1	0	1	0
Am	104	0	1	0											Ch	55	1	0	1	0	1	0
Am	105	0	1	0											Ch	56	1	0	1	0	1	0
Am	106	0	1	0											Ch	57	1	0	1	0	1	0
Am	107	0	1	0											Ch	58	1	0	1	0	1	0
Am	108	0	1	0											Ch	59	1	0	1	0	1	0
Am	109	0	1	0											Ch	60	1	0	1	0	1	0
Am	110	0	1	0											Ch	61	1	0	1	0	1	0
Am	111	0	1	0											Ch	62	1	0	1	0	1	0
Am	112	0	1	0											Ch	63	1	0	1	0	1	0
Am	113	0	1	0											Ch	64	1	0	1	0	1	0
Am	114	0	1	0											Ch	65	1	0	1	0	1	0
Am	115	0	1	0											Ch	66	1	0	1	0	1	0
Am	116	0	1	0											Ch	67	1	0	1	0	1	0
Am	117	0	1	0											Ch	68	1	0	1	0	1	0
Am	118	0	1	0											Ch	69	1	0	1	0	1	0
Am	119	0	1	0											Ch	70	1	0	1	0	1	0
Am	120	0	1	0											Ch	71	1	0	1	0	1	0
Am	121	0	1	0											Ch	72	1	0	1	0	1	0
Am	122	0	1	0											Ch	73	1	0	1	0	1	0
Am	123	0	1	0											Ch	74	1	0	1	0	1	0
Am	124	0	1	0											Ch	75	1	0	1	0	1	0
Am	125	0	1	0											Ch	76	1	0	1	0	1	0
Am	126	0	1	0											Ch	77	1	0	1	0	1	0
Am	127	0	1	0											Ch	78	1	0	1	0	1	0
Am	128	0	1	0											Ch	79	1	0	1	0	1	0
Am	129	0	1	0											Ch	80	1	0	1	0	1	0
Am	130	0	1	0											Ch	81	1	0	1	0	1	0
Am	131	0	1	0											Ch	82	1	0	1	0	1	0
Am	132	0	1	0											Ch	83	1	0	1	0	1	0
Am	133	0	1	0											Ch	84	1	0	1	0	1	0
Am	134	0	1	0											Ch	85	1	0	1	0	1	0
Am	135	0	1	0											Ch	86	1	0	1	0	1	0
Am	136	0	1	0											Ch	87	1	0	1	0	1	0
Am	137	0	1	0											Ch	88	1	0	1	0	1	0
Am	138	0	1	0											Ch	89	1	0	1	0	1	0
Am	139	0	1	0											Ch	90	1	0	1	0	1	0
Am	140	0	1	0											Ch	91	1	0	1	0	1	0
Am	141	0	1	0											Ch	92	1	0	1	0	1	0
Am	142	0	1	0											Ch	93	1	0	1	0	1	0
Am	143	0	1	0											Ch	94	1	0	1	0	1	0
Am	144	0	1	0											Ch	95	1	0	1	0	1	0
Ch	1	0	0	1											Ch	96	1	0	1	0	1	0
Ch	2	0	1	0											Cl	1	1	0	1	0	0	1
Ch	3	0	0	1											Cl	2	1	0	1	0	1	0
Ch	4	0	0	1											Cl	3	1	0	1	0	0	1
Ch	5	0	1	0											Cl	4	1	0	1	0	0	1
Ch	6	1	0	0											Cl	5	1	0	1	0	0	1
Ch	7	0	0	1											Cl	6	1	0	1	0	1	0
Ch	8	0	0	1											Cl	7	1	0	1	0	0	1
Ch	9	0	0	1											Cl	8	1	0	1	0	0	1
Ch	10	1	0	0											Cl	9	1	0	1	0	1	0
Ch	11	1	0	0											Cl	10	1	0	1	0	0	1
Ch	12	1	0	0											Cl	11	1	0	1	0	0	1
Ch	13	1	0	0											Cl	12	1	0	1	0	1	0
Ch	14	0	1	0											Cl	13	1	0	1	0	0	1
Ch	15	0	0	1											Cl	14	1	0	1	0	0	1
Ch	16	0	1	0											Cl	15	1	0	1	0	0	1
Ch	17	0	1	0											Cl	16	1	0	1	0	1	0
Ch	18	0	1	0											Cl	17	1	0	1	0	0	1
Ch	19	0	1	0											Cl	18	1	0	1	0	0	1
Ch	20	0	1	0											Cl	19	1	0	1	0	0	1
Ch	21	0	1	0											Cl	20	1	0	1	0	1	0
Ch	22	0	1	0											Cl	21	1	0	1	0	0	1
Ch	23	0	1	0											Cl	22	1	0	1	0	0	1
Ch	24	0	0	1											Cl	23	1	0	1	0	1	0
Ch	25	0	1	0											Cl	24	1	0	1	0	0	1
Ch	26	0	1	0											Cl	25	1	0	1	0	0	1
Ch	27	0	1	0											Cl	26	1	0	1	0	1	0
Ch	28	0	1	0											Cl	27	1	0	1	0	0	1
Ch	29	0	1	0											Cl	28	1	0	1	0	0	1
Ch	30	0	1	0											Cl	29	1	0	1	0	0	1
Ch	31	0	1	0											Cl	30	1	0	1	0	0	1
Ch	32	0	1	0											Cl	31	1	0	1	0	0	1
Ch	33	0	1	0											Cl	32	1	0	1	0	0	1
Ch	34	0	1	0											Cl	33	1	0	1	0	0	1
Ch	35	0	1	0											Cl	34	1	0	1	0	1	0
Ch	36	0	1	0											Cl	35	1	0	1	0	0	1
Ch	37	0	1	0											Cl	36	1	0	1	0	1	0
Ch	38	0	1	0											Cl	37	1	0	1	0	0	1
Ch	39	0	1	0											Cl	38	1	0	1	0	0	1
Ch	40	0	1	0											Cl	39	1	0	1	0	0	1
Ch	41	0	1	0											Cl	40	1	0	1	0	1	0
Ch	42	0	1	0											Cl	41	1	0	1	0	0	1
Ch	43	0	1	0											Cl	42	1	0	1	0	0	1
Ch	44	0	1	0											Cl	43	1	0	1	0	0	1
Ch	45	0	1	0											Cl	44	1	0	1	0	1	0
Ch	46	0	1	0											Cl	45	1	0	1	0	0	1
Ch	47	0	1	0											Cl	46	1	0	1	0	0	1
Ch	48	0	1	0											Cl	47	1	0	1	0	1	0
Ch	49	0	1	0											Cl	48	1	0	1	0	0	1
Ch	50	0	1	0											Cl	49	1	0	1	0	0	1
Ch	51	0	1	0											Cl	50	1	0	1	0	1	0
Ch	52	0	1	0											Cl	51	1	0	1	0	0	1
Ch	53	0	1	0											Cl	52	1	0	1	0	1	0
Ch	54	0	1	0											Cl	53	1	0	1	0	0	1
Ch	55	0	1	0											Cl	54	1	0	1	0	1	0
Ch	56	0	1	0											Cl	55	1	0	1	0	0	1
Ch	57	0	1	0											Cl	56	1	0	1	0	1	0
Ch	58	0	1	0											Cl	57	1	0	1	0	0	1
Ch	59	0	1	0											Cl	58	1	0	1	0	1	0
Ch	60	0	1	0											Cl	59	1	0	1	0	0	1
Ch	61	0	1	0											Cl	60	1	0	1	0	0	1
Ch	62	0	1	0											Cl	61	1	0	1	0	1	0
Ch	63	0	1	0											Cl	62	1	0	1	0	0	1
Ch	64	0	1	0											Cl	63	1	0	1	0	0	1
Ch	65	0	1	0											Cl	64	1	0	1	0	1	0
Ch	66	0	1	0											Cl	65	1	0	1	0	0	1
Ch	67	0	1	0											Cl	66	1	0	1	0	0	1
Ch	68	0	1	0											Cl	67	1	0	1	0	1	0
Ch	69	0	1	0											Cl	68	1	0	1	0	0	1
Ch	70	0	1	0											Cl	69	1	0	1	0	1	0
Ch	71	0	1	0											Cl	70	1	0	1	0	0	1
Ch	72	0	1	0											Cl	71	1	0	1	0	0	1
Ch	73	0	1	0											Cl	72	1	0	1	0	1	0
Ch	74	0	1	0											Cl	73	1	0	1	0	0	1
Ch	75	0	1	0											Cl	74	1	0	1	0	0	1
Ch	76	0	1	0											Cl	75	1	0	1	0	0	1
Ch	77	0	1	0											Cl	76	1	0	1	0	0	1
Ch	78	0	1	0											Cl	77	1	0	1	0	1	0
Ch	79	0	1	0											Cl	78	1	0	1	0	0	1
Ch	80	0	1	0											Cl	79	1	0	1	0	1	0
Ch	81	0	1	0											Cl	80	1	0	1	0	0	1
Ch	82	0	1	0											Cl	81	1	0	1	0	1	0
Ch	83	0	1	0											Cl	82	1	0	1	0	0	1
Ch	84	0	1	0											Cl	83	1	0	1	0	1	0
Ch	85	0	1	0											Cl	84	1	0	1	0	0	1
Ch	86	0	1	0											Cl	85	1	0	1	0	1	0
Ch	87	0	1	0											Cl	86	1	0	1	0	1	0
Ch	88	0	1	0											Cl	87	1	0	1	0	0	1
Ch	89	0	1	0											Cl	88	1	0	1	0	0	1
Ch	90	0	1	0											Cl	89	1	0	1	0	0	1
Ch	91	0	1	0											Cl	90	1	0	1	0	0	1
Ch	92	0	1	0											Cl	91	1	0	1	0	0	1
Ch	93	0	1	0											Cl	92	1	0	1	0	0	1
Ch	94	0	1	0											Cl	93	1	0	1	0	1	0
Ch	95	0	1	0											Cl	94	1	0	1	0	0	1
Ch	96	0	1	0											Cl	95	1	0	1	0	0	1
Ch	97	0	1	0											Cl	96	1	0	1	0	1	0
Ch	98	0	1	0											Pl	1	0	1	0	1	1	0
Ch	99	0	1	0											Pl	2	1	0	1	0	1	0
Ch	100	0	1	0											Pl	3	0	1	0	1	1	0
Ch	101	0	1	0											Pl	4	1	0	1	0	0	1
Ch	102	0	1	0											Pl	5	1	0	0	1	1	0
Ch	103	0	1	0											Pl	6	1	0	1	0	1	0
Ch	104	0	1	0											Pl	7	0	1	1	0	1	0
Ch	105	0	1	0											Pl	8	1	0	0	1	0	1
Ch	106	0	1	0											Pl	9	1	0	1	0	0	1
Ch	107	0	1	0											Pl	10	1	0	0	1	1	0
Ch	108	0	1	0											Pl	11	1	0	1	0	1	0
Ch	109	0	1	0											Pl	12	1	0	0	1	0	1
Ch	110	0	1	0											Pl	13	1	0	0	1	0	1
Ch	111	0	1	0											Pl	14	1	0	1	0	1	0
Ch	112	0	1	0											Pl	15	1	0	0	1	0	1
Ch	113	0	1	0											Pl	16	1	0	1	0	0	1
Ch	114	0	1	0											Pl	17	1	0	0	1	1	0
Ch	115	0	1	0											Pl	18	1	0	1	0	0	1
Ch	116	0	1	0											Pl	19	1	0	1	0	1	0
Ch	117	0	1	0											Pl	20	1	0	1	0	0	1
Ch	118	0	1	0											Pl	21	1	0	1	0	1	0
Ch	119	0	1	0											Pl	22	1	0	0	1	1	0
Ch	120	0	1	0											Pl	23	1	0	1	0	0	1
Ch	121	0	1	0											Pl	24	1	0	1	0	1	0
Ch	122	0	1	0											Pl	25	1	0	1	0	1	0
Ch	123	0	1	0											Pl	26	1	0	1	0	0	1
Ch	124	0	1	0											Pl	27	1	0	1	0	1	0
Ch	125	0	1	0											Pl	28	0	1	1	0	0	1
Ch	126	0	1	0											Pl	29	1	0	1	0	0	1
Ch	127	0	1	0											Pl	30	1	0	1	0	1	0
Ch	128	0	1	0											Pl	31	1	0	0	1	0	1
Ch	129	0	1	0											Pl	32	1	0	1	0	0	1
Ch	130	0	1	0											Pl	33	1	0	1	0	1	0
Ch	131	0	1	0											Pl	34	1	0	1	0	0	1
Ch	132	0	1	0											Pl	35	1	0	1	0	1	0
Ch	133	0	1	0											Pl	36	1	0	1	0	0	1
Ch	134	0	1	0											Pl	37	1	0	1	0	1	0
Ch	135	0	1	0											Pl	38	1	0	1	0	1	0
Ch	136	0	1	0											Pl	39	1	0	1	0	0	1
Ch	137	0	1	0											Pl	40	1	0	1	0	0	1
Ch	138	0	1	0											Pl	41	1	0	1	0	0	1
Ch	139	0	1	0											Pl	42	1	0	1	0	1	0
Ch	140	0	1	0											Pl	43	1	0	1	0	0	1
Ch	141	0	1	0											Pl	44	1	0	1	0	0	1
Ch	142	0	1	0											Pl	45	1	0	1	0	1	0
Ch	143	0	1	0											Pl	46	1	0	1	0	0	1
Ch	144	0	1	0											Pl	47	1	0	1	0	1	0
Cl	1	0	1	0											Pl	48	1	0	1	0	0	1
Cl	2	0	1	0											Pl	49	1	0	1	0	1	0
Cl	3	0	1	0											Pl	50	1	0	1	0	0	1
Cl	4	0	1	0											Pl	51	1	0	1	0	0	1
Cl	5	0	1	0											Pl	52	1	0	1	0	1	0
Cl	6	0	1	0											Pl	53	1	0	1	0	0	1
Cl	7	0	1	0											Pl	54	1	0	1	0	1	0
Cl	8	0	1	0											Pl	55	1	0	1	0	1	0
Cl	9	0	1	0											Pl	56	1	0	1	0	0	1
Cl	10	0	1	0											Pl	57	1	0	0	1	1	0
Cl	11	0	1	0											Pl	58	1	0	1	0	0	1
Cl	12	0	1	0											Pl	59	1	0	1	0	1	0
Cl	13	0	1	0											Pl	60	1	0	1	0	1	0
Cl	14	0	1	0											Pl	61	1	0	1	0	0	1
Cl	15	0	1	0											Pl	62	1	0	1	0	1	0
Cl	16	0	1	0											Pl	63	1	0	1	0	0	1
Cl	17	0	1	0											Pl	64	1	0	1	0	1	0
Cl	18	0	1	0											Pl	65	1	0	1	0	0	1
Cl	19	0	1	0											Pl	66	1	0	1	0	1	0
Cl	20	0	1	0											Pl	67	1	0	1	0	0	1
Cl	21	0	1	0											Pl	68	1	0	1	0	1	0
Cl	22	0	1	0											Pl	69	1	0	1	0	0	1
Cl	23	0	1	0											Pl	70	1	0	1	0	1	0
Cl	24	0	1	0											Pl	71	1	0	1	0	0	1
Cl	25	0	1	0											Pl	72	1	0	1	0	1	0
Cl	26	0	1	0											Pl	73	1	0	1	0	0	1
Cl	27	0	1	0											Pl	74	1	0	1	0	1	0
Cl	28	0	1	0											Pl	75	1	0	1	0	0	1
Cl	29	0	1	0											Pl	76	1	0	1	0	1	0
Cl	30	0	1	0											Pl	77	1	0	1	0	0	1
Cl	31	0	1	0											Pl	78	1	0	1	0	1	0
Cl	32	0	1	0											Pl	79	1	0	1	0	0	1
Cl	33	0	1	0											Pl	80	1	0	1	0	1	0
Cl	34	0	1	0											Pl	81	1	0	1	0	0	1
Cl	35	0	1	0											Pl	82	1	0	1	0	0	1
Cl	36	0	1	0											Pl	83	1	0	1	0	1	0
Cl	37	0	1	0											Pl	84	1	0	1	0	0	1
Cl	38	0	1	0											Pl	85	1	0	1	0	1	0
Cl	39	0	1	0											Pl	86	1	0	1	0	0	1
Cl	40	0	1	0											Pl	87	1	0	1	0	0	1
Cl	41	0	1	0											Pl	88	1	0	1	0	1	0
Cl	42	0	1	0											Pl	89	1	0	1	0	0	1
Cl	43	0	1	0											Pl	90	1	0	1	0	1	0
Cl	44	0	1	0											Pl	91	1	0	1	0	0	1
Cl	45	0	1	0											Pl	92	1	0	1	0	1	0
Cl	46	0	1	0											Pl	93	1	0	1	0	0	1
Cl	47	0	1	0											Pl	94	1	0	1	0	1	0
Cl	48	0	1	0											Pl	95	1	0	1	0	1	0
Cl	49	0	1	0											Pl	96	1	0	1	0	0	1
Cl	50	0	1	0											Pn	1	1	0	0	1	1	0
Cl	51	0	1	0											Pn	2	1	0	0	1	1	0
Cl	52	0	1	0											Pn	3	1	0	0	1	1	0
Cl	53	0	1	0											Pn	4	1	0	0	1	1	0
Cl	54	0	1	0											Pn	5	1	0	0	1	1	0
Cl	55	0	1	0											Pn	6	1	0	0	1	1	0
Cl	56	0	1	0											Pn	7	1	0	0	1	1	0
Cl	57	0	1	0											Pn	8	1	0	0	1	1	0
Cl	58	0	1	0											Pn	9	0	1	0	1	1	0
Cl	59	0	1	0											Pn	10	1	0	0	1	1	0
Cl	60	0	1	0											Pn	11	1	0	0	1	1	0
Cl	61	0	1	0											Pn	12	0	1	0	1	1	0
Cl	62	0	1	0											Pn	13	1	0	0	1	1	0
Cl	63	0	1	0											Pn	14	1	0	0	1	1	0
Cl	64	0	1	0											Pn	15	1	0	0	1	1	0
Cl	65	0	1	0											Pn	16	1	0	0	1	1	0
Cl	66	0	1	0											Pn	17	1	0	0	1	1	0
Cl	67	0	1	0											Pn	18	1	0	0	1	1	0
Cl	68	0	1	0											Pn	19	1	0	0	1	1	0
Cl	69	0	1	0											Pn	20	1	0	0	1	1	0
Cl	70	0	1	0											Pn	21	1	0	0	1	1	0
Cl	71	0	1	0											Pn	22	1	0	0	1	1	0
Cl	72	0	1	0											Pn	23	1	0	0	1	1	0
Cl	73	0	1	0											Pn	24	1	0	0	1	1	0
Cl	74	0	1	0											Pn	25	1	0	0	1	1	0
Cl	75	0	1	0											Pn	26	1	0	0	1	1	0
Cl	76	0	1	0											Pn	27	1	0	0	1	1	0
Cl	77	0	1	0											Pn	28	1	0	0	1	1	0
Cl	78	0	1	0											Pn	29	1	0	0	1	1	0
Cl	79	0	1	0											Pn	30	1	0	0	1	1	0
Cl	80	0	1	0											Pn	31	1	0	0	1	1	0
Cl	81	0	1	0											Pn	32	1	0	0	1	1	0
Cl	82	0	1	0											Pn	33	1	0	0	1	1	0
Cl	83	0	1	0											Pn	34	1	0	0	1	1	0
Cl	84	0	1	0											Pn	35	1	0	0	1	1	0
Cl	85	0	1	0											Pn	36	1	0	0	1	1	0
Cl	86	0	1	0											Pn	37	1	0	0	1	1	0
Cl	87	0	1	0											Pn	38	1	0	0	1	1	0
Cl	88	0	1	0											Pn	39	1	0	0	1	1	0
Cl	89	0	1	0											Pn	40	1	0	0	1	1	0
Cl	90	0	1	0											Pn	41	1	0	0	1	1	0
Cl	91	0	1	0											Pn	42	1	0	0	1	1	0
Cl	92	0	1	0											Pn	43	1	0	0	1	1	0
Cl	93	0	1	0											Pn	44	1	0	0	1	1	0
Cl	94	0	1	0											Pn	45	1	0	0	1	1	0
Cl	95	0	1	0											Pn	46	1	0	0	1	1	0
Cl	96	0	1	0											Pn	47	1	0	0	1	1	0
Cl	97	0	1	0											Pn	48	1	0	0	1	1	0
Cl	98	0	1	0											Pn	49	1	0	0	1	1	0
Cl	99	0	1	0											Pn	50	1	0	0	1	1	0
Cl	100	0	1	0											Pn	51	1	0	0	1	1	0
Cl	101	0	1	0											Pn	52	1	0	0	1	1	0
Cl	102	0	1	0											Pn	53	1	0	0	1	1	0
Cl	103	0	1	0											Pn	54	1	0	0	1	1	0
Cl	104	0	1	0											Pn	55	1	0	0	1	1	0
Cl	105	0	1	0											Pn	56	1	0	0	1	1	0
Cl	106	0	1	0											Pn	57	1	0	0	1	1	0
Cl	107	0	1	0											Pn	58	1	0	0	1	1	0
Cl	108	0	1	0											Pn	59	1	0	0	1	1	0
Cl	109	0	1	0											Pn	60	1	0	0	1	1	0
Cl	110	0	1	0											Pn	61	1	0	0	1	1	0
Cl	111	0	1	0											Pn	62	1	0	0	1	1	0
Cl	112	0	1	0											Pn	63	1	0	0	1	1	0
Cl	113	0	1	0											Pn	64	1	0	0	1	1	0
Cl	114	0	1	0											Pn	65	1	0	0	1	1	0
Cl	115	0	1	0											Pn	66	1	0	0	1	1	0
Cl	116	0	1	0											Pn	67	1	0	0	1	1	0
Cl	117	0	1	0											Pn	68	1	0	0	1	1	0
Cl	118	0	1	0											Pn	69	1	0	0	1	1	0
Cl	119	0	1	0											Pn	70	1	0	0	1	1	0
Cl	120	0	1	0											Pn	71	1	0	0	1	1	0
Cl	121	0	1	0											Pn	72	1	0	0	1	1	0
Cl	122	0	1	0											Pn	73	1	0	0	1	1	0
Cl	123	0	1	0											Pn	74	1	0	0	1	1	0
Cl	124	0	1	0											Pn	75	1	0	0	1	1	0
Cl	125	0	1	0											Pn	76	1	0	0	1	1	0
Cl	126	0	1	0											Pn	77	1	0	0	1	1	0
Cl	127	0	1	0											Pn	78	1	0	0	1	1	0
Cl	128	0	1	0											Pn	79	1	0	0	1	1	0
Cl	129	0	1	0											Pn	80	1	0	0	1	1	0
Cl	130	0	1	0											Pn	81	1	0	0	1	1	0
Cl	131	0	1	0											Pn	82	1	0	0	1	1	0
Cl	132	0	1	0											Pn	83	1	0	0	1	1	0
Cl	133	0	1	0											Pn	84	1	0	0	1	1	0
Cl	134	0	1	0											Pn	85	1	0	0	1	1	0
Cl	135	0	1	0											Pn	86	1	0	0	1	1	0
Cl	136	0	1	0											Pn	87	1	0	0	1	1	0
Cl	137	0	1	0											Pn	88	1	0	0	1	1	0
Cl	138	0	1	0											Pn	89	1	0	0	1	1	0
Cl	139	0	1	0											Pn	90	1	0	0	1	1	0
Cl	140	0	1	0											Pn	91	1	0	0	1	1	0
Cl	141	0	1	0											Pn	92	1	0	0	1	1	0
Cl	142	0	1	0											Pn	93	1	0	0	1	1	0
Cl	143	0	1	0											Pn	94	1	0	0	1	1	0
Cl	144	0	1	0											Pn	95	1	0	0	1	1	0
Pl	1	0	0	1											Pn	96	1	0	0	1	1	0
Pl	2	0	1	0
Pl	3	1	0	0
Pl	4	0	0	1
Pl	5	1	0	0
Pl	6	0	0	1
Pl	7	1	0	0
Pl	8	0	1	0
Pl	9	0	1	0
Pl	10	0	1	0
Pl	11	0	1	0
Pl	12	0	0	1
Pl	13	1	0	0
Pl	14	0	1	0
Pl	15	0	0	1
Pl	16	0	1	0
Pl	17	0	1	0
Pl	18	0	1	0
Pl	19	0	1	0
Pl	20	1	0	0
Pl	21	0	0	1
Pl	22	0	1	0
Pl	23	0	1	0
Pl	24	0	1	0
Pl	25	0	1	0
Pl	26	0	1	0
Pl	27	0	1	0
Pl	28	0	1	0
Pl	29	0	1	0
Pl	30	0	1	0
Pl	31	0	1	0
Pl	32	0	1	0
Pl	33	0	1	0
Pl	34	0	0	1
Pl	35	0	1	0
Pl	36	0	1	0
Pl	37	0	1	0
Pl	38	0	1	0
Pl	39	0	1	0
Pl	40	0	0	1
Pl	41	0	1	0
Pl	42	0	1	0
Pl	43	0	1	0
Pl	44	0	1	0
Pl	45	0	1	0
Pl	46	0	1	0
Pl	47	0	1	0
Pl	48	0	1	0
Pl	49	0	1	0
Pl	50	0	1	0
Pl	51	0	0	1
Pl	52	0	1	0
Pl	53	0	1	0
Pl	54	0	1	0
Pl	55	0	1	0
Pl	56	0	1	0
Pl	57	0	1	0
Pl	58	0	1	0
Pl	59	0	1	0
Pl	60	0	1	0
Pl	61	0	1	0
Pl	62	0	1	0
Pl	63	0	1	0
Pl	64	0	1	0
Pl	65	0	1	0
Pl	66	0	1	0
Pl	67	0	1	0
Pl	68	0	1	0
Pl	69	0	1	0
Pl	70	0	1	0
Pl	71	0	1	0
Pl	72	0	1	0
Pl	73	0	1	0
Pl	74	0	1	0
Pl	75	0	1	0
Pl	76	0	1	0
Pl	77	0	1	0
Pl	78	0	1	0
Pl	79	0	1	0
Pl	80	0	1	0
Pl	81	0	1	0
Pl	82	0	1	0
Pl	83	0	1	0
Pl	84	0	1	0
Pl	85	0	1	0
Pl	86	0	1	0
Pl	87	0	1	0
Pl	88	0	1	0
Pl	89	0	1	0
Pl	90	0	1	0
Pl	91	0	1	0
Pl	92	0	1	0
Pl	93	0	1	0
Pl	94	0	1	0
Pl	95	0	1	0
Pl	96	0	1	0
Pl	97	0	1	0
Pl	98	0	1	0
Pl	99	0	1	0
Pl	100	0	1	0
Pl	101	0	1	0
Pl	102	0	1	0
Pl	103	0	1	0
Pl	104	0	1	0
Pl	105	0	1	0
Pl	106	0	1	0
Pl	107	0	1	0
Pl	108	0	1	0
Pl	109	0	1	0
Pl	110	0	1	0
Pl	111	0	1	0
Pl	112	0	1	0
Pl	113	0	1	0
Pl	114	0	1	0
Pl	115	0	1	0
Pl	116	0	1	0
Pl	117	0	1	0
Pl	118	0	1	0
Pl	119	0	1	0
Pl	120	0	1	0
Pl	121	0	1	0
Pl	122	0	1	0
Pl	123	0	1	0
Pl	124	0	1	0
Pl	125	0	1	0
Pl	126	0	1	0
Pl	127	0	1	0
Pl	128	0	1	0
Pl	129	0	1	0
Pl	130	0	1	0
Pl	131	0	1	0
Pl	132	0	1	0
Pl	133	0	1	0
Pl	134	0	1	0
Pl	135	0	1	0
Pl	136	0	1	0
Pl	137	0	1	0
Pl	138	0	1	0
Pl	139	0	1	0
Pl	140	0	1	0
Pl	141	0	1	0
Pl	142	0	1	0
Pl	143	0	1	0
Pl	144	0	1	0
Pn	1	1	0	0
Pn	2	0	1	0
Pn	3	0	0	1
Pn	4	0	1	0
Pn	5	0	1	0
Pn	6	0	1	0
Pn	7	0	0	1
Pn	8	0	1	0
Pn	9	0	1	0
Pn	10	0	1	0
Pn	11	0	1	0
Pn	12	0	1	0
Pn	13	0	1	0
Pn	14	0	1	0
Pn	15	0	1	0
Pn	16	0	1	0
Pn	17	0	1	0
Pn	18	0	0	1
Pn	19	0	0	1
Pn	20	0	0	1
Pn	21	0	0	1
Pn	22	0	0	1
Pn	23	0	0	1
Pn	24	0	1	0
Pn	25	0	0	1
Pn	26	0	0	1
Pn	27	0	0	1
Pn	28	0	0	1
Pn	29	0	0	1
Pn	30	0	0	1
Pn	31	0	0	1
Pn	32	0	0	1
Pn	33	0	0	1
Pn	34	0	0	1
Pn	35	0	0	1
Pn	36	0	0	1
Pn	37	0	0	1
Pn	38	0	0	1
Pn	39	0	0	1
Pn	40	0	0	1
Pn	41	0	0	1
Pn	42	0	0	1
Pn	43	0	0	1
Pn	44	0	0	1
Pn	45	0	0	1
Pn	46	0	0	1
Pn	47	0	0	1
Pn	48	0	0	1
Pn	49	0	0	1
Pn	50	0	0	1
Pn	51	0	0	1
Pn	52	0	0	1
Pn	53	0	0	1
Pn	54	0	0	1
Pn	55	0	0	1
Pn	56	0	0	1
Pn	57	0	0	1
Pn	58	0	0	1
Pn	59	0	0	1
Pn	60	0	0	1
Pn	61	0	0	1
Pn	62	0	1	0
Pn	63	0	0	1
Pn	64	0	0	1
Pn	65	0	1	0
Pn	66	0	0	1
Pn	67	0	0	1
Pn	68	0	0	1
Pn	69	0	1	0
Pn	70	0	0	1
Pn	71	0	1	0
Pn	72	0	0	1
Pn	73	0	1	0
Pn	74	0	0	1
Pn	75	0	1	0
Pn	76	0	1	0
Pn	77	0	0	1
Pn	78	0	1	0
Pn	79	0	0	1
Pn	80	0	0	1
Pn	81	0	0	1
Pn	82	0	0	1
Pn	83	0	0	1
Pn	84	0	0	1
Pn	85	0	0	1
Pn	86	0	0	1
Pn	87	0	0	1
Pn	88	0	0	1
Pn	89	0	0	1
Pn	90	0	0	1
Pn	91	0	0	1
Pn	92	0	0	1
Pn	93	0	0	1
Pn	94	0	0	1
Pn	95	0	0	1
Pn	96	0	0	1
Pn	97	0	0	1
Pn	98	0	1	0
Pn	99	0	1	0
Pn	100	0	1	0
Pn	101	0	1	0
Pn	102	0	1	0
Pn	103	0	1	0
Pn	104	0	0	1
Pn	105	0	1	0
Pn	106	0	1	0
Pn	107	0	0	1
Pn	108	0	0	1
Pn	109	0	0	1
Pn	110	0	1	0
Pn	111	0	0	1
Pn	112	0	1	0
Pn	113	0	0	1
Pn	114	0	1	0
Pn	115	0	0	1
Pn	116	0	0	1
Pn	117	0	1	0
Pn	118	0	1	0
Pn	119	0	0	1
Pn	120	0	0	1
Pn	121	0	0	1
Pn	122	0	1	0
Pn	123	0	1	0
Pn	124	0	0	1
Pn	125	0	0	1
Pn	126	0	1	0
Pn	127	0	0	1
Pn	128	0	0	1
Pn	129	0	0	1
Pn	130	0	0	1
Pn	131	0	0	1
Pn	132	0	0	1
Pn	133	0	0	1
Pn	134	0	0	1
Pn	135	0	0	1
Pn	136	0	0	1
Pn	137	0	0	1
Pn	138	0	0	1
Pn	139	0	0	1
Pn	140	0	0	1
Pn	141	0	1	0
Pn	142	0	0	1
Pn	143	0	1	0
Pn	144	0	1	0
